# Supplementary material for: 中学校・高等学校における「保健の授業」の実態と保健体育教諭の意識
Source: Royal Society of Chemistry journal article supplement (doi:10.1039/d0ra10144c), 1996-08-25
Supplement: d0ra10144c1.pdf [file d0ra10144c1.pdf]

## Supporting information

### Physiological Effect of the Colloidal Carbon Quantum Dots on

#### *Bursaphelenchus xylophilus*

Yi Han, Yaqian Han, Guicai Du, Tingting Zhang, Qunqun Guo, Hong Yang, Ronggui

Li\*, Yuanhong Xu\*

College of Life Sciences, Qingdao University, Qingdao 266071, China

\*Corresponding Authors: Ronggui Li (lrg@qdu.edu.cn) and Yuanhong

Xu(yh xu@qdu.edu.cn)

Table S1 Primers of 24 DEGs

| Wormbase ID | Type | Primer F                      | Primer R                  |
|-------------|------|-------------------------------|---------------------------|
| BXY_0530300 | down | ACTCCACCGCTGATATTGC           | AATGCCGTTGATTGATGATTCCG   |
| BXY_0581500 | down | ACGGAGATACGAACTGGAGA<br>G     | TGCCTGTATAATGTTTTCGCTCTTT |
| BXY_0123500 | down | GCTGGTGGATGTGCTGTT            | GCGGCTTGAACCTGGACAA       |
| BXY_1669000 | down | ATTCTCATCAACAACGCTGGAT<br>T   | CACGCTGACGCATTATTGGA      |
| BXY_0582900 | down | GTCAACCCTCAAGAGTGCTCA         | TTCCCGTCAACGATTTTCCTC     |
| BXY_0255000 | down | CTTCTGCCTCTGCTCCATTG          | CGCCATAAGCCGACACATAG      |
| BXY_0299200 | down | GCCACACCATCACCAGATT           | GCTTTCAGTTTCTCCTGTTTCC    |
| BXY_0075200 | down | TTGTAGTGAAGGTGAAGAGAAT<br>TGG | ATGTCCGCTGTTGCTGTAAG      |
| BXY_0412700 | down | CGCCACAACACAGTCAGT            | GTTTCAGCAGGTCTTCGTTCTT    |
| BXY_0546100 | down | ACGAAGGTTGCTATGGAGAA          | GGTGGACGAAGAAGACTGTTG     |
| BXY_0522200 | down | GCACTCGGACCTGTTGAAG           | GCTCTTGTCATCCACGAACTT     |
| BXY_1236200 | down | GTTGAAGGTTACAGGTGATGAC<br>T   | TAGAGACGAATGGGACGGTATT    |
| BXY_0330200 | up   | GGTCCTTGTTGGCACAGTTC          | CCTCTGGCAGTAATCGGTCAT     |
| BXY_0501600 | up   | GGTCGTTATACCGCATCTATCT        | GCTTCCTCCACCGTCTGT        |
| BXY_0670800 | up   | GAGTAACGAGACAAGAGGTTG<br>ATAC | GAGATTCCCAGGCATTTC        |
| BXY_1755800 | up   | TGTATGCTCTTCTTGACGAATGC       | ACGGACGATGTGAGATGGT       |
| BXY_0586400 | up   | GCGGAGAGAAGCAACGAAT           | GCGATGCGACACTGTGAA        |
| BXY_0626900 | up   | GGAGACCTATGAGAATGATGTT<br>GTG | GCCGATAGAAGCCAAGTTGTAAT   |
| BXY_1025900 | up   | GAGAAGTTCAAGAAGAAGACG<br>AGAG | CGAGGAGACGGTTGAGGAA       |
| BXY_0419500 | up   | CGGCGTCCACAACAACAT            | CCTTCTTCTCCACCTCGTTCA     |
| BXY_1706500 | up   | TGATGGGATGAGTGACGAAAC         | GCTGCGGAAACGGTAGATT       |
| BXY_0116800 | up   | CTTCCACTCAATAATACGCAAC<br>CA  | TTCCAACGATTCCAACACTCTG    |
| BXY_1064200 | up   | AATGGACGGCTTATGGAATGG         | CTGCGGCTGAGAGTTGAG        |
| BXY_0629000 | up   | GGCGATGTTGAGAAGTTGGA          | CCGCAGTTGGCTTGAGAT        |

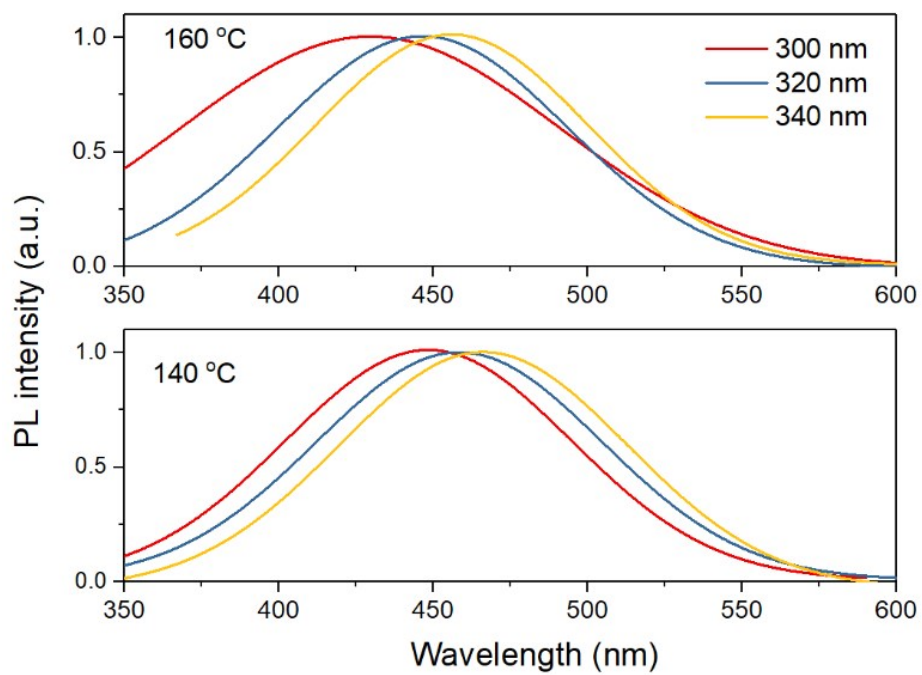

Figure S1 The excitation-dependent photoluminescence under 140°C and 160 °C

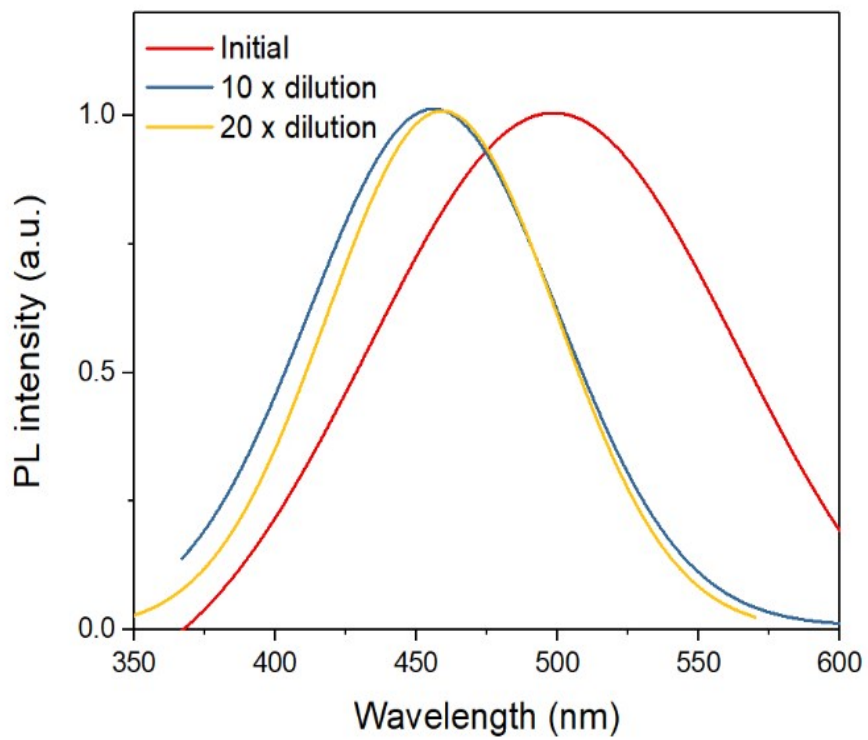

Figure S2 PL spectrum under initial concentration, 10 times dilution and 20 times dilution

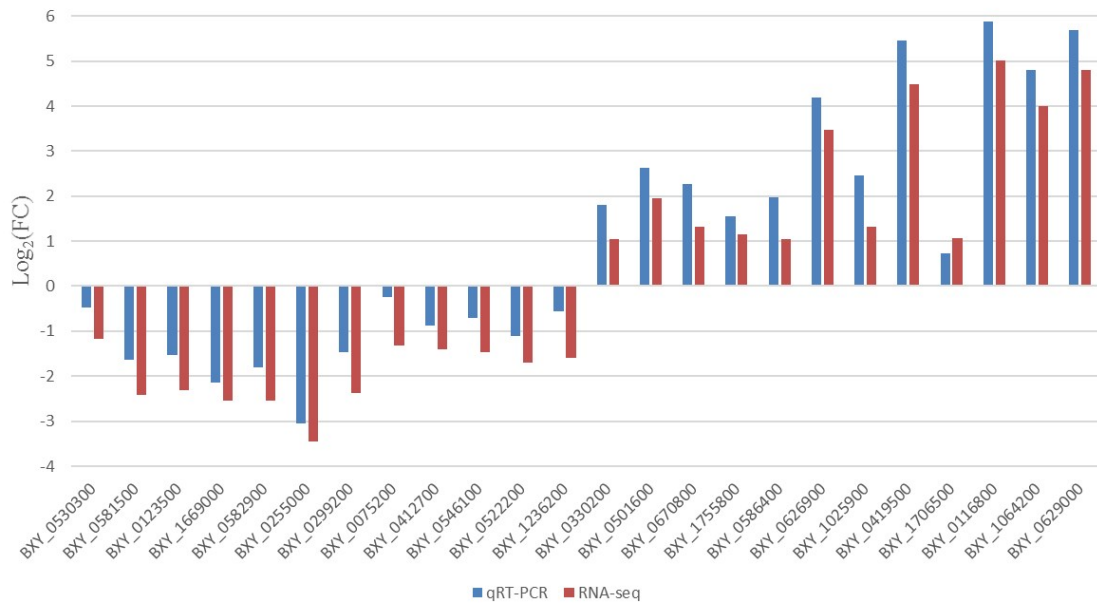

**Figure S3** qRT-PCR validation of transcriptome data

**Table S2** DEGs related to the detoxification process

| Wormbase ID                          | Log <sub>2</sub> (FC) | Type | Annotation                                         |
|--------------------------------------|-----------------------|------|----------------------------------------------------|
| <i>cytochrome P450:</i>              |                       |      |                                                    |
| BXY_1188700                          | 4.494645              | up   | cytochrome P450-33C2                               |
| BXY_1345300                          | 4.435065              | up   | cytochrome P450-33C2                               |
| BXY_0451400                          | 2.861694              | up   | cytochrome P450-33C2                               |
| BXY_0170600                          | 2.147061              | up   | cytochrome P450-33C2                               |
| BXY_0799900                          | 2.068291              | up   | cytochrome P450-33C9, partial                      |
| BXY_0537000                          | -2.10431              | down | cytochrome P450-33C2                               |
| BXY_0111800                          | -2.29708              | down | cytochrome P450-33C4                               |
| BXY_0800100                          | -2.30255              | down | cytochrome P450-33C9, partial                      |
| BXY_0625200                          | -2.63122              | down | cytochrome P450-33C2                               |
| BXY_0074600                          | -2.69735              | down | cytochrome P450 33D3                               |
| <i>UDP-glucuronosyl transferase:</i> |                       |      |                                                    |
| BXY_1673100                          | 5.031705              | up   | UDP-glucuronosyl transferase 2C1                   |
| BXY_1108300                          | 4.450396              | up   | Putative UDP-glucuronosyltransferase ugt-47        |
| BXY_1073700                          | 3.317977              | up   | UDP-glucosyl transferase domain containing protein |
| BXY_1091400                          | 2.831768              | up   | Putative UDP-glucuronosyltransferase ugt-47        |
| BXY_0112900                          | 2.540596              | up   | UDP-glucuronosyltransferase 2C1                    |
| BXY_0491700                          | 2.256199              | up   | Putative UDP-glucuronosyltransferase ugt-47        |
| BXY_0497500                          | -2.20101              | down | UDP-glucuronosyltransferase 2C1                    |
| <i>glutathione S-transferase:</i>    |                       |      |                                                    |
| BXY_1297200                          | 6.205655              | up   | Probable glutathione S-transferase 8               |
| BXY_0629000                          | 4.802866              | up   | sigma class glutathione S-transferase              |
| BXY_0629100                          | 4.498351              | up   | sigma class glutathione S-transferase              |
| BXY_1562700                          | 3.372303              | up   | sigma class glutathione S-transferase              |
| BXY_0298300                          | 3.08482               | up   | Glutathione S-transferase 1                        |
| BXY_0628900                          | 2.343462              | up   | sigma class glutathione S-transferase              |
| BXY_1562600                          | 2.271064              | up   | sigma class glutathione S-transferase              |
| BXY_0175000                          | -2.2381               | down | sigma class glutathione S-transferase              |
| BXY_0299200                          | -2.38221              | down | Glutathione S-transferase                          |
| BXY_0298200                          | -2.47133              | down | Glutathione S-transferase                          |
| <i>Carboxylesterase:</i>             |                       |      |                                                    |
| BXY_0407500                          | -2.52669              | down | Carboxylesterase, type B domain-containing protein |

**Table S3** DEGs related to the Fatty acid degradation

| Wormbase ID | Log <sub>2</sub> (FC) | Type | Annotation                                           |
|-------------|-----------------------|------|------------------------------------------------------|
| BXY_0104400 | 7.314855              | up   | Acyl-CoA synthetase family member 2, mitochondrial   |
| BXY_0116800 | 5.024139              | up   | Propionyl-CoA carboxylase beta chain, mitochondrial  |
| BXY_0104500 | 4.990822              | up   | Acyl-CoA synthetase family member 2, mitochondrial   |
| BXY_0419500 | 4.488005              | up   | Propionyl-CoA carboxylase alpha chain, mitochondrial |
| BXY_0670900 | 2.703808              | up   | ACetyl-CoA Acyl transferase 2 homolog                |
| BXY_0654500 | 2.081778              | up   | Acyl-CoA oxidase/dehydrogenase                       |

**Table S4** DEGs related to the Locomotion (GO:0040011).

| Wormbase ID | Log <sub>2</sub> (FC) | Type | Annotation                                                      |
|-------------|-----------------------|------|-----------------------------------------------------------------|
| BXY_0104700 | 10.51242              | up   | hypothetical protein B9Z55_020222                               |
| BXY_0104400 | 7.314855              | up   | Acyl-CoA synthetase family member 2,mitochondrial               |
| BXY_1061400 | 6.448054              | up   | 4-coumarate--CoA ligase 3                                       |
| BXY_0104500 | 4.990822              | up   | Acyl-CoA synthetase family member 2,mitochondrial               |
| BXY_0829000 | 4.58125               | up   | PREDICTED: macrophage migration inhibitory factor-like          |
| BXY_0823300 | 4.320412              | up   | hypothetical protein Y032_0227g2821                             |
| BXY_0240300 | -3.59318              | down | dual specificity mitogen-activated protein kinase kinase 7-like |

**Table S5** DEGs related to the Reproduction (GO:0000003).

| Wormbase ID | Log <sub>2</sub> (FC) | Type | Annotation                                                         |
|-------------|-----------------------|------|--------------------------------------------------------------------|
| BXY_0829000 | 4.58125               | up   | PREDICTED: macrophage migration inhibitory factor-like             |
| BXY_1014400 | 3.349453              | up   | Phosphate-regulating neutral endopeptidase                         |
| BXY_0847600 | 3.152507              | up   | hypothetical protein B9Z55_019797                                  |
| BXY_1580400 | -3.66461              | down | Putative transporter                                               |
| BXY_0240300 | -3.59318              | down | dual specificity mitogen-activated protein kinase kinase 7-like    |
| BXY_1148300 | -3.51447              | down | PREDICTED: uncharacterized protein K02A2.6-like                    |
| BXY_0255000 | -3.45972              | down | oxidoreductase, short chain dehydrogenase/reductase family protein |
| BXY_0499000 | -3.28241              | down | 17beta-hydroxysteroid dehydrogenase, partial                       |
| BXY_0027200 | -3.17717              | down | hypothetical protein FL83_04848, partial                           |
